# Supplementary material for: Defining Changes in the Spatial Distribution and Composition of Brain Lipids in the Shiverer and Cuprizone Mouse Models of Myelin Disease
Source: PubMed Central journal article supplement — J Histochem Cytochem. 2018 Nov 30;67(3):203–19. doi: 10.1369/0022155418815860 (PMC6393840; doi:10.1369/0022155418815860), 2018-11-30
Supplement: DS_10.1369_0022155418815860.pdf [file DS_10.1369_0022155418815860.pdf]

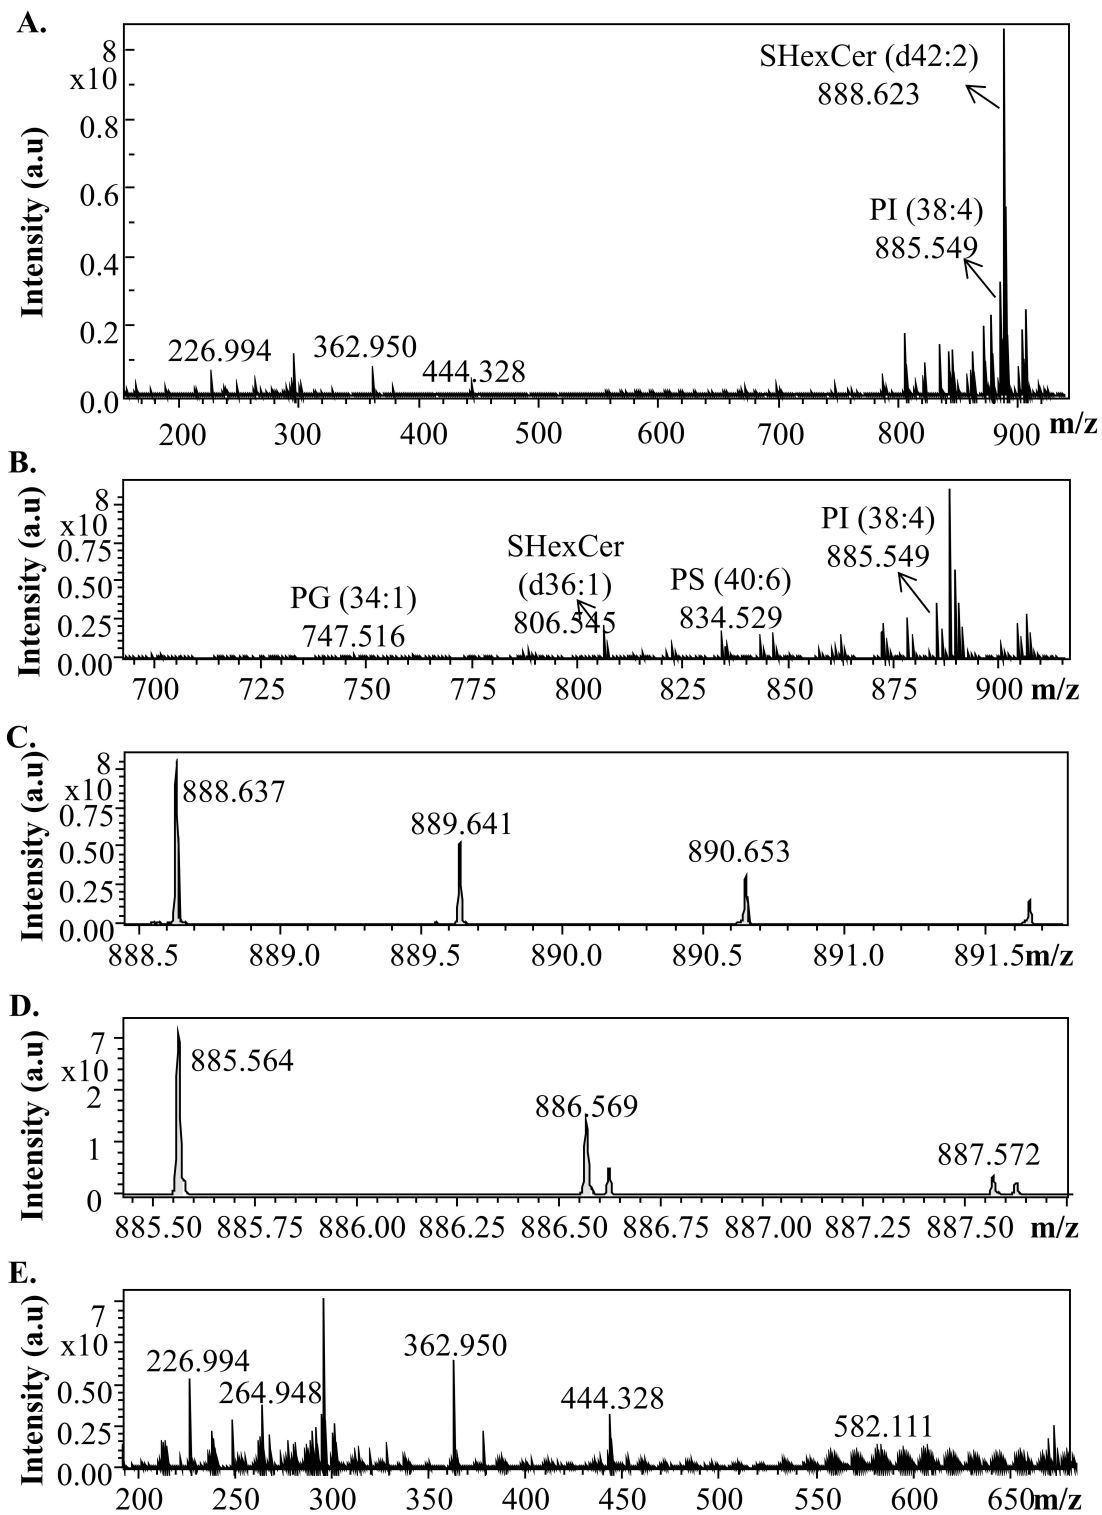

Supplemental Figure 1

**Figure S1. A representative average mass spectrum acquired from an entire sagittal section of a normal mouse brain by FTICR based MALDI-IMS in negative mode.** (A) Mass (m/z) range 200-900. Lipid ion with m/z 888.6234 assigned to sulfatide, SHexCer (d42:2), was the most intense peak. (B) Magnified view between m/z 700-900 where most lipid associated peaks were detected (C) Isotopic peak pattern of m/z 888.637 that was intensely distributed in the white matter. (D) Isotopic peak pattern of m/z 885.564 assigned to phosphatidylinositol, PI (38:4) that was predominantly detected in the grey matter. (E) Lower m/z range 200-650. Peaks less than 400 m/z have low signal to noise ratios and contains matrix background.

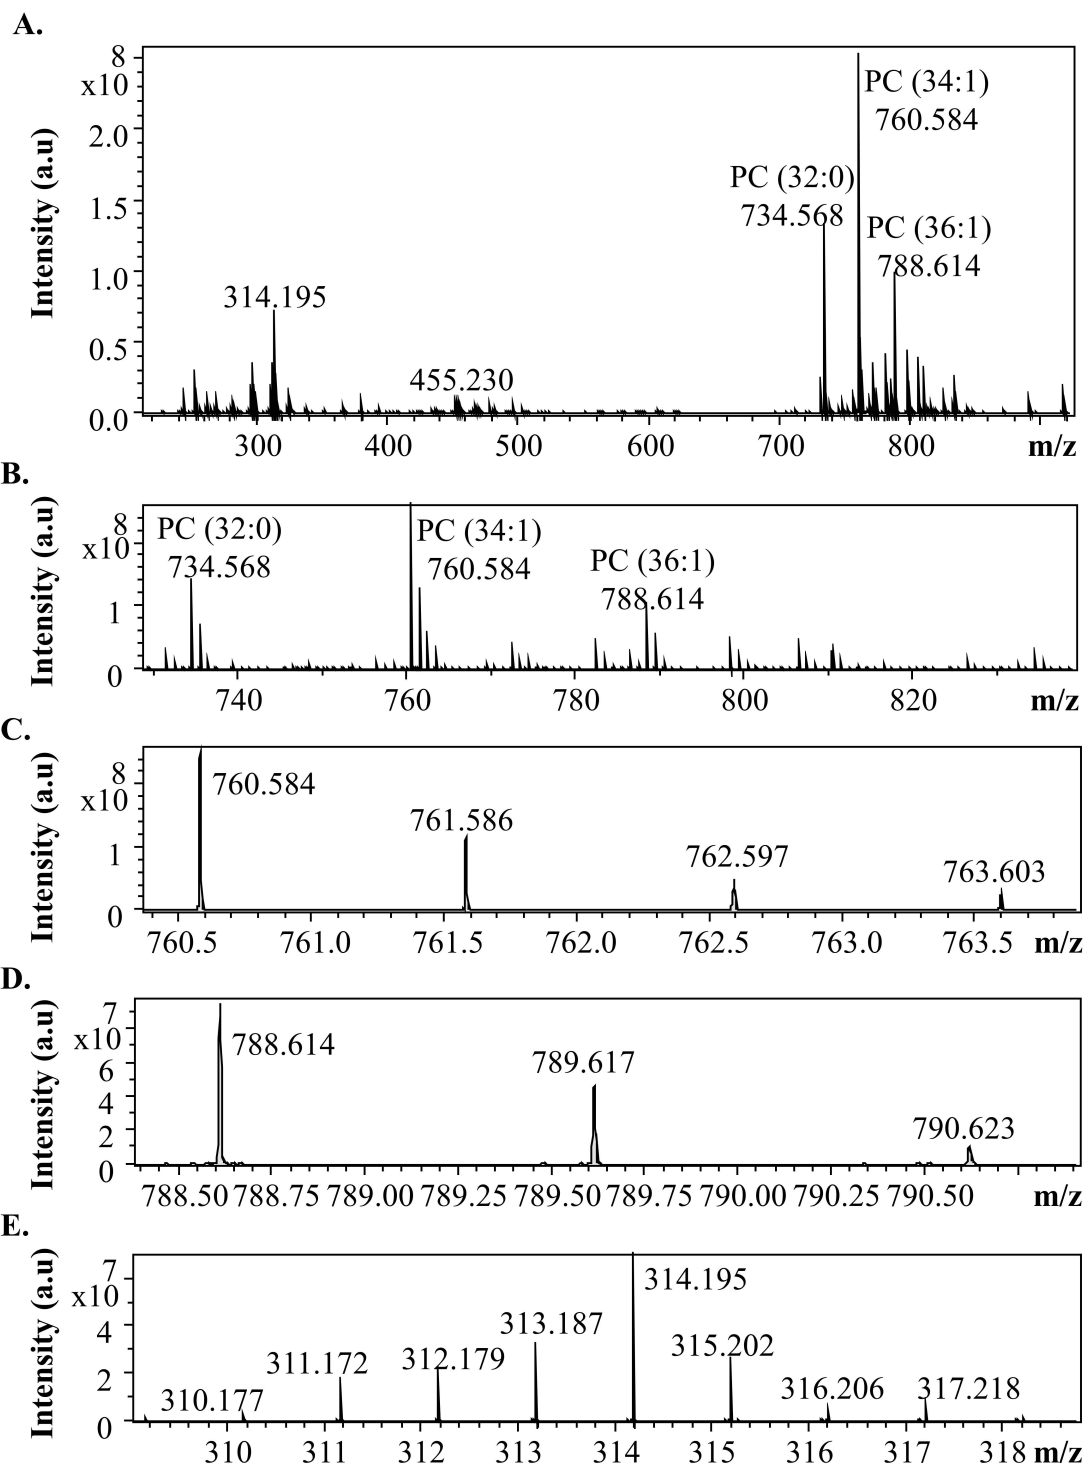

Supplemental Figure 2

**Figure S2. A representative average mass spectrum acquired from an entire sagittal section of a normal mouse brain by FTICR based MALDI-IMS in positive mode.** (A) m/z range 200-900. (B) Magnified view of 700-900 m/z range where most lipid associated peaks were detected. Shown are the three predominant phosphatidylcholines (PC) in decreasing order of their intensities: 760.584, PC (34:1); 734.568, PC (32:0); and 788.614, PC (36:1). (C) Isotopic peak pattern of m/z 760.584, a ubiquitous phospholipid distributed in both the grey and white matter. (D) Isotopic peak pattern of m/z 788.614 that was predominantly detected in the white matter. (E) Lower m/z range <400. Peak assignment was not performed due to low signal to noise and presence of large matrix adducts.

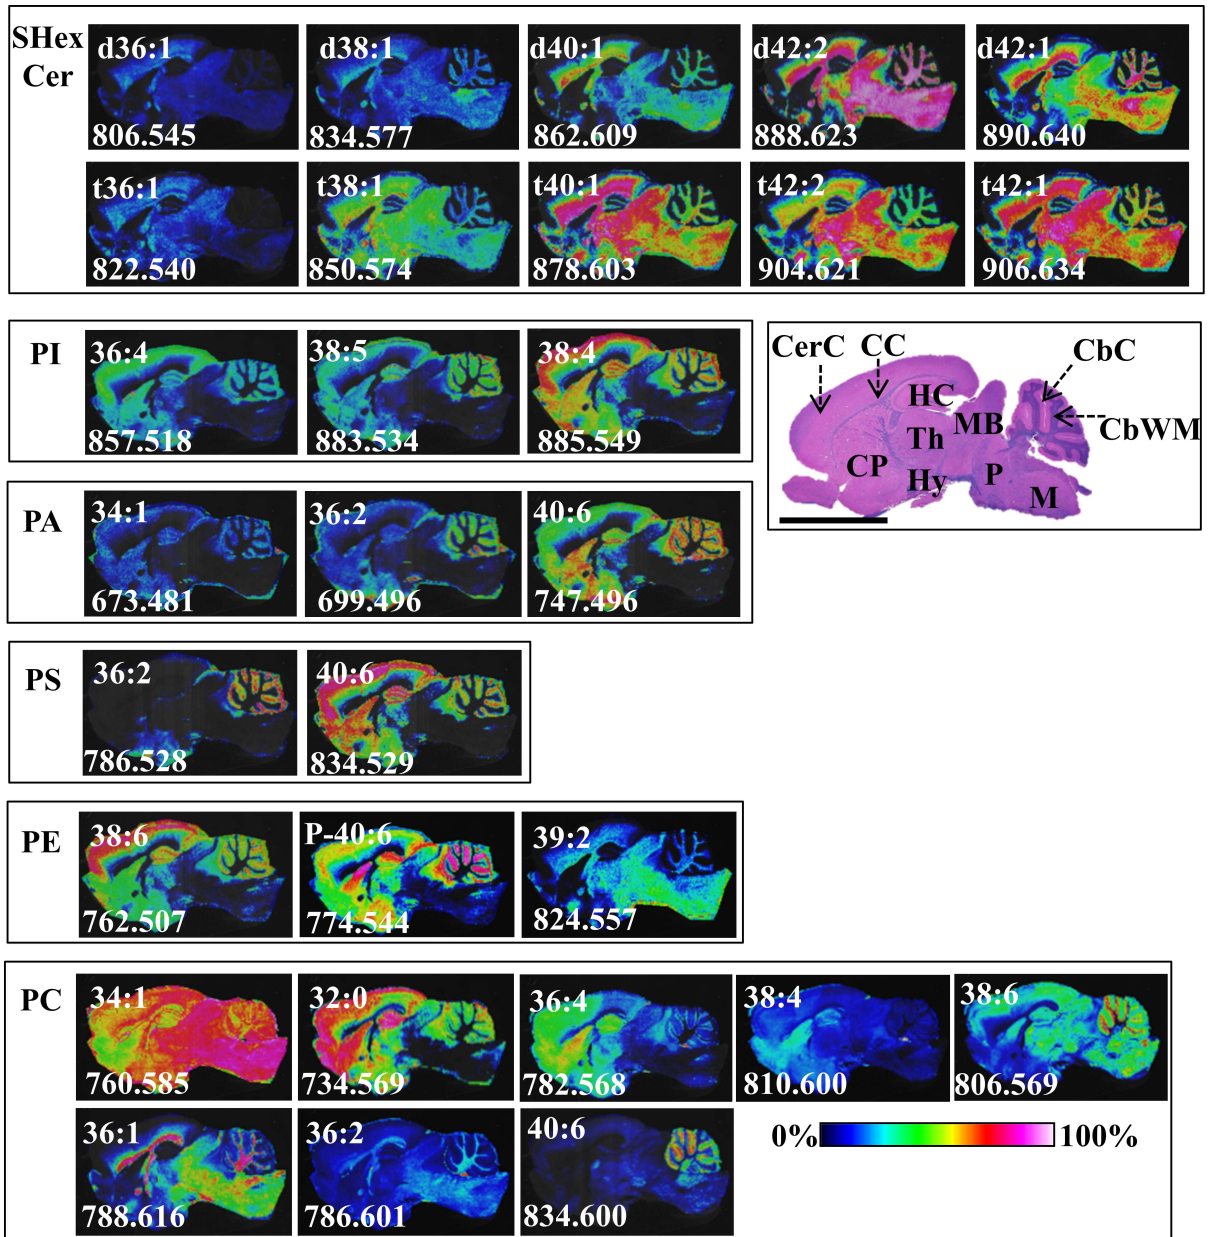

Supplemental Figure 3

**Figure S3. FTICR based MALDI-IMS derived spatial distribution pattern of lipids revealed the histological features of the normal mouse brain.** Schematic of a sagittal mouse brain section co-stained with LFB and H&E is shown. The following anatomic zones are labeled: cerebral cortex (CerC), corpus callosum (CC), hippocampus (HC), caudate putamen (CP), thalamus (Th), hypothalamus (Hy), midbrain (MB), cerebellar cortex (CbC), cerebellar white matter (CbWM), pons (P) and medulla (M). The outlined image panels display distribution of molecular species that belong to the respective lipid sub-group. The m/z and annotations are noted on individual images of each panel. The annotation represents the total number of carbon atoms present in the head group and fatty acid chain of the respective lipid. The number of double bonds is listed after the colon punctuation. The prefixes 'd' and 't' indicates the presence of non-hydroxylated and hydroxylated fatty acid chain linked to the sulfated ceramide backbone of SHexCer. The SHexCer particularly those with very long chain fatty acids (greater than 40 carbons combined) were distributed in the myelin-enriched regions of the white matter such as the CC, CbWM, MB, Th, P and M. Other lipid ions including PI, PC, PA, PS and PE exhibit a heterogenous distribution pattern in the grey matter regions. The PI (38:4) was intensely detected in CerC, HC and CbC. PA (36:2), PS (36:2) and PC (40:6) were localized in the CbC. PE (39:2) was distributed mainly in the CC, Th, MB, P and M. PC (34:1) was the most intense positive ion and distributed ubiquitously across the various grey matter and white matter regions. PC (36:1) and PC (36:2) show similar distribution patterns and were localized in the CC, CbWM, MB, P and M. PC (32:0) was localized in CerC, CP, HC and CbC and PC (38:4) was confined to CP and HC. Spatial resolution, 80 $\mu$ m; scale bar, 5mm.

A.

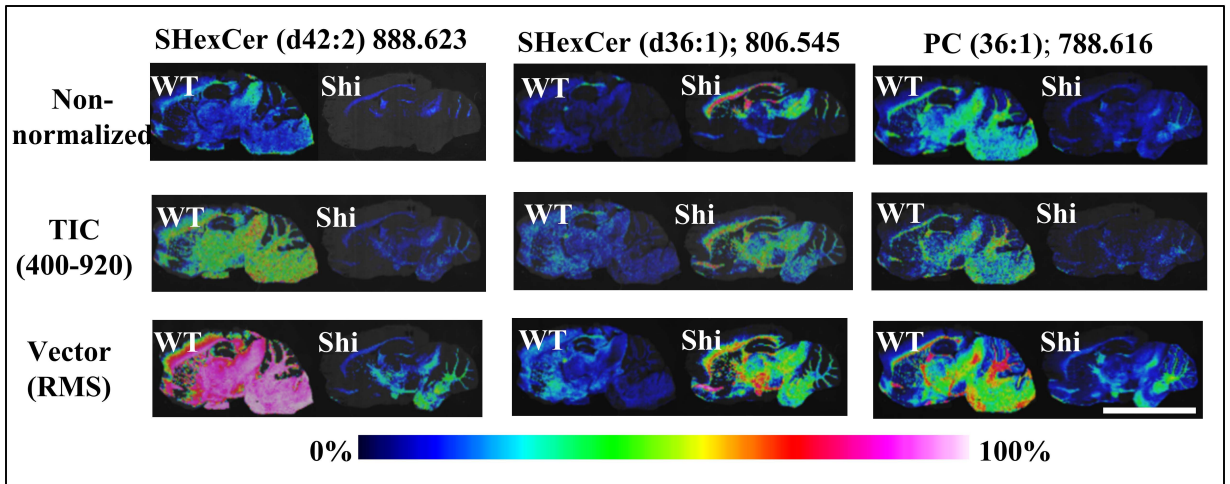

B.

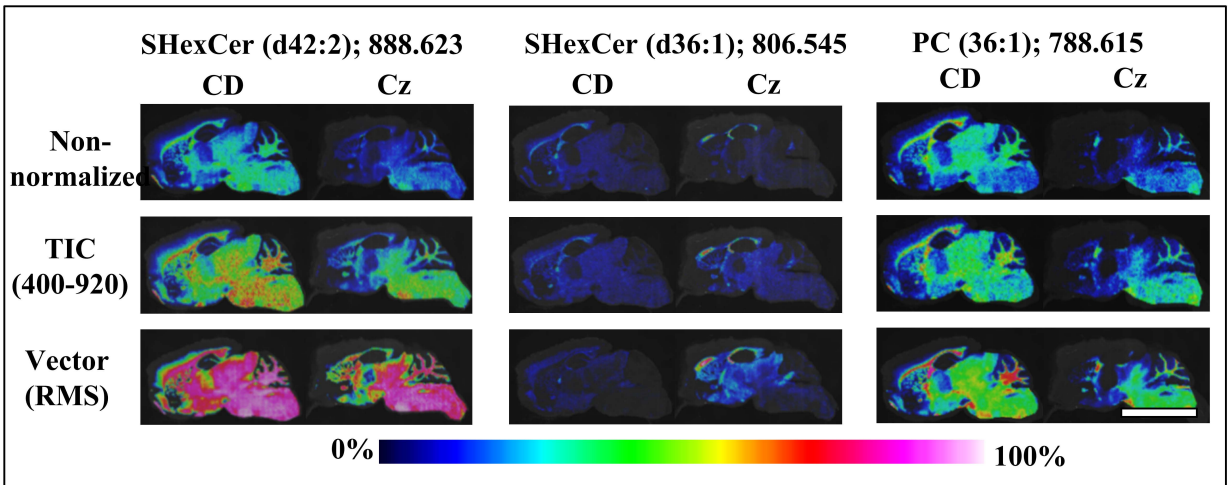

**Figure S4. Observed lipid distribution pattern in the Shi mouse brain was independent of normalization procedure.** The Bruker Daltonics flexImaging software supports Total Ion Current (TIC) and Root-Mean-Square of all peak (RMS) normalization procedures. Mass spectrometric images in columns are the ion distribution maps of SHexCer (d42:2), SHexCer (d36:1) and PC (36:1). Shown in rows are non-normalized, total ion current (TIC; between m/z range 400-920)-normalized and vector (root mean squared, RMS)-normalized MS images.

**(A)** comparison of lipid species between WT and Shi mice. SHexCer (d42:2) and PC (36:1) have decreased spatial intensities in the Shi mouse; whereas, spatial intensity of SHexCer (d36:1) was increased. Spatial resolution, 80 $\mu$ m; scale bar, 5mm.

**(B)** Comparison of WT (chow diet) and cuprizone-fed (at 6w) mice. SHexCer (d42:2) and PC (36:1) have decreased spatial intensities in the Cz-fed mouse; whereas, spatial intensity of SHexCer (d36:1) was increased. Spatial resolution, 80 $\mu$ m; scale bar, 5mm.



A.

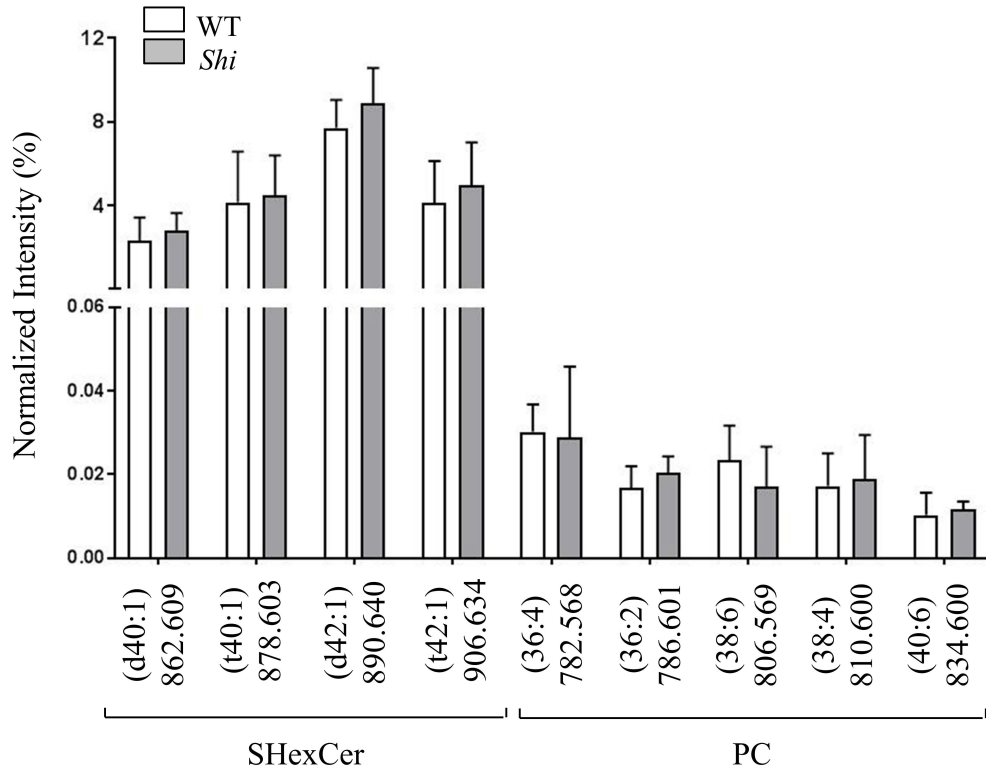

B.

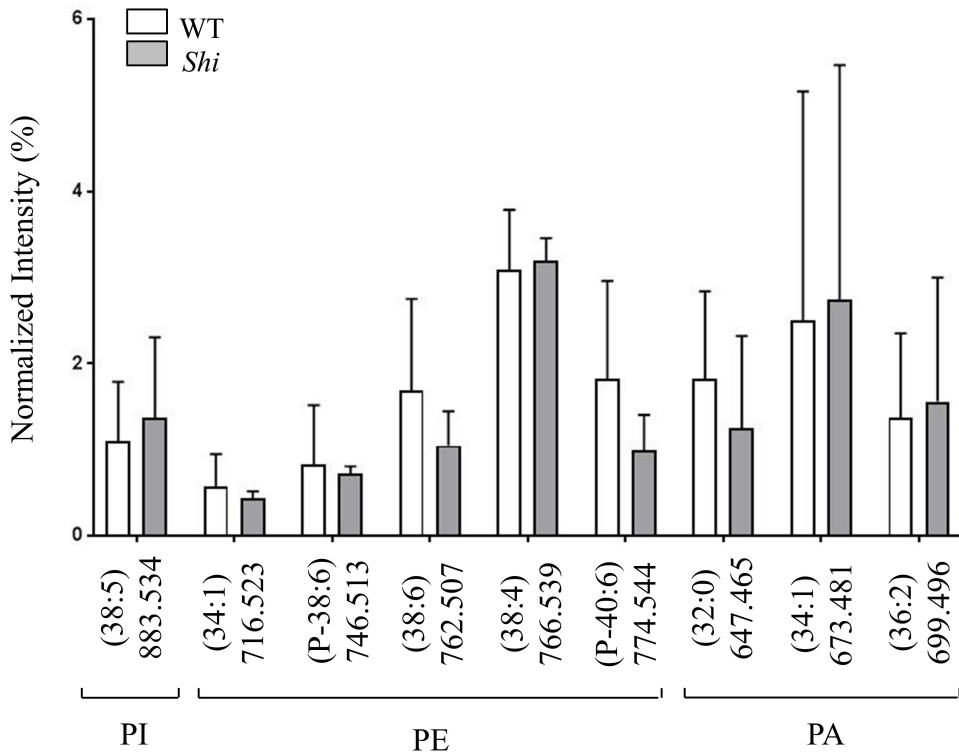

**Figure S5. Normalized intensity charts of additional sulfatide and phospholipid species that did not differ between the Shi and WT mouse (A-B).** There was no significant difference in the normalized intensities of the SHexCer and PC species listed here as well as other phospholipid species that belong to PI, PA and PE between the Shi and WT mouse. SHexCer, sulfatide; PI, phosphatidylinositol; PA, phosphatidic acid; and PE, phosphatidylethanolamine; two-way ANOVA; differences were considered as significant when  $p < 0.05$ ;  $n = 5$ .

A.

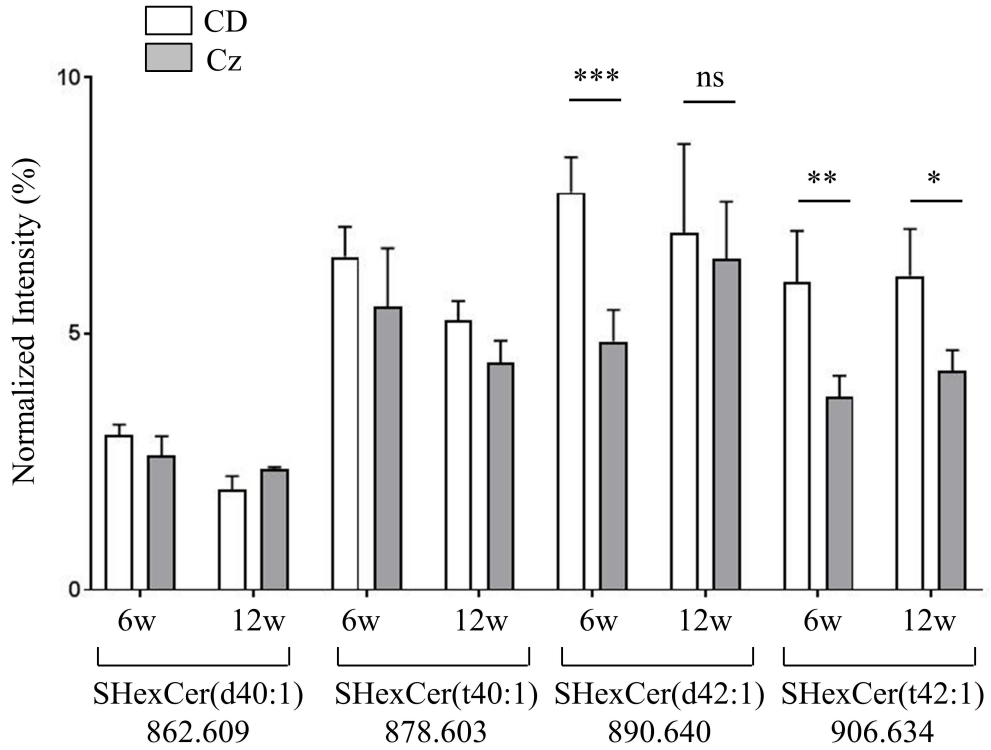

B.

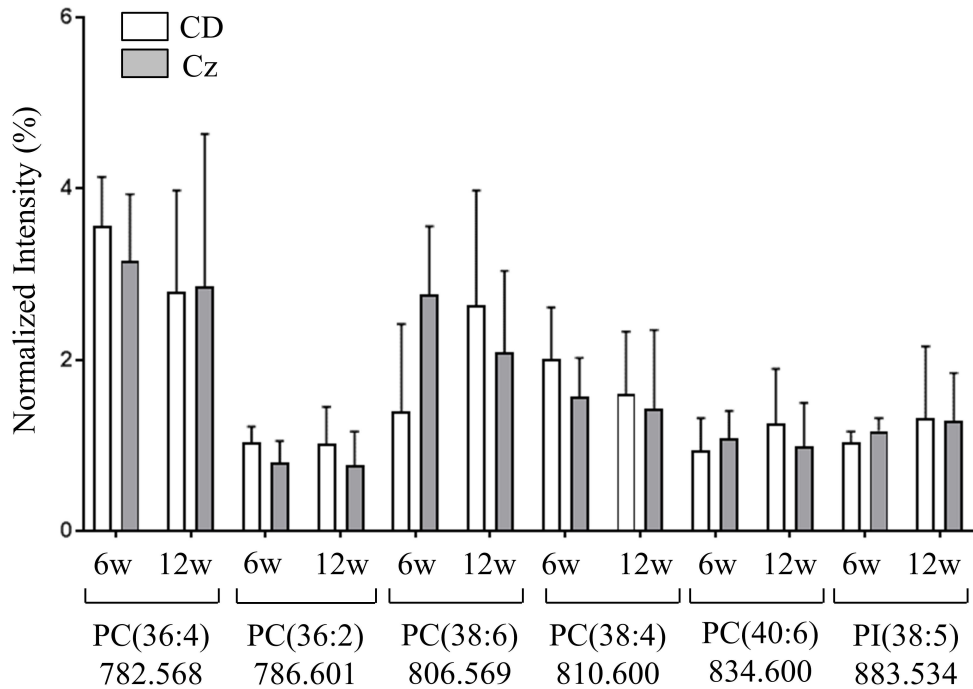

Supplemental Figure 6AB

C.

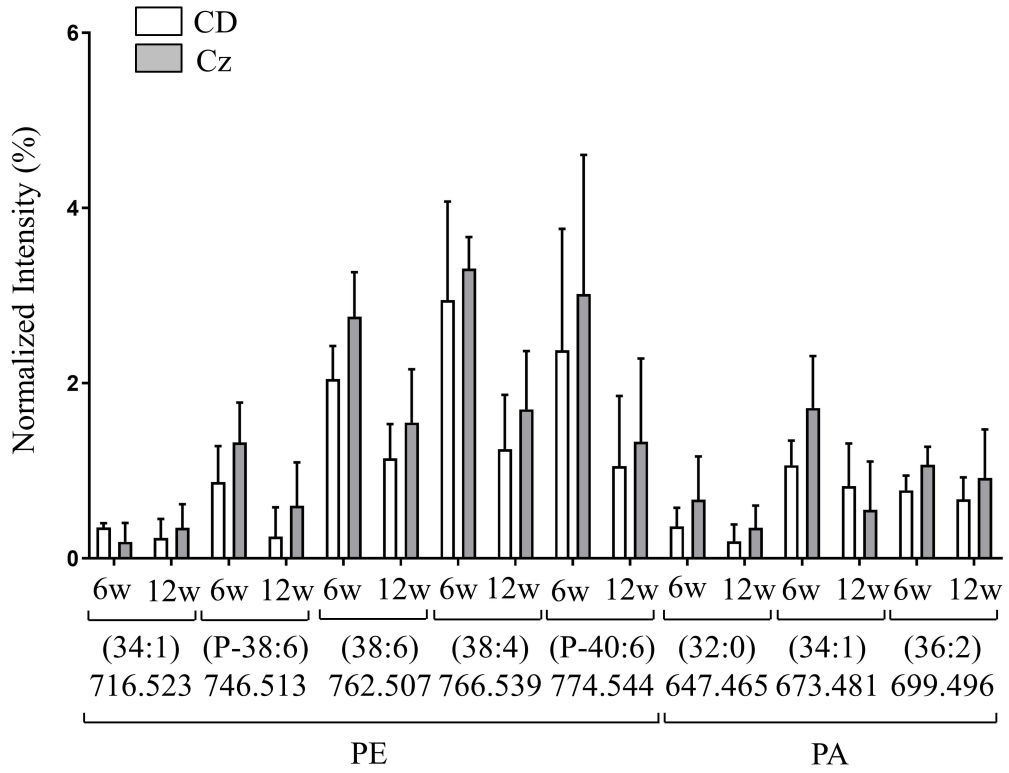

**Figure S6. Normalized intensity charts of additional sulfatide species and phospholipid in the Cz-fed and CD-fed mouse (A-C).** A, there was no significant difference in the normalized intensities of SHexCer (d40:1) and SHexCer (t40:1) between the Cz-fed and CD-fed mouse at 6w and 12w. Normalized intensities of SHerCer (d42:1) and SHerCer (t42:1) were significantly decreased at 6w in Cz-mice. By 12w, the intensities of both lipid species restored. However, the intensity of SHexCer (t42:1) remained significantly lower compared to the CD-fed mouse. B, there was no significant difference in the normalized intensities of PC and PI species listed here at both 6w and 12w points between the Cz-fed and CD-fed mouse. C, Normalized intensities of PE and PA also do not significantly differ nor there was a particular trend in the changes between the Cz-fed and Cd-fed mouse at both 6w and 12w. Two-way ANOVA; differences were considered as significant when  $p < 0.05$ .

| m/z (Avg) | RT (Avg) | Matched Mass | Delta    | Formula   | Ion                                 | CD-6W (Avg) | CD-6W (SD) | Cz-6W (Avg) | Cz-6W (SD) | Ratio Cz/CD | P value |
|-----------|----------|--------------|----------|-----------|-------------------------------------|-------------|------------|-------------|------------|-------------|---------|
| 369.352   | 11.522   | 369.3516     | -0.00042 | C27H45    | [M+H-H <sub>2</sub> O] <sup>+</sup> | 2.86E+08    | 8.83E+07   | 2.73E+08    | 3.92E+07   | 9.55E-01    | 0.73    |
| 387.363   | 11.5469  | 387.3627     | -0.00031 | C27H47O   | [M+H] <sup>+</sup>                  | 2.79E+06    | 1.37E+06   | 2.02E+06    | 1.11E+06   | 7.25E-01    | 0.12    |
| 404.389   | 11.5211  | 404.3892     | 0.000239 | C27H50N   | [M+NH <sub>4</sub> ] <sup>+</sup>   | 2.41E+08    | 5.42E+07   | 1.99E+08    | 3.13E+07   | 8.28E-01    | 0.11    |
| 409.345   | 11.6108  | 409.3446     | -0.00037 | C27H46ONa | [M+Na] <sup>+</sup>                 | 3.85E+06    | 2.43E+06   | 1.61E+06    | 6.10E+05   | 4.19E-01    | 0.10    |

m/z = mass; RT = retention time; CD = chow diet (control); Cz = cuprizone diet; Avg = average; SD = standard deviation. Highlighted are average total ion currents.

**Figure S7. Cholesterol ions were detected with LC-ESI-MS.** There was a small reduction in the ion intensities of 6w Cz-fed mouse compared to CD-fed mouse (highlighted columns in the table below). However, there were no statistically significant difference in the cholesterol levels between CD-fed versus 6w Cz-fed mouse.

**Table S1.** In situ identification of lipids in sagittal mouse brain sections by FTICR based MALDI-IMS in the negative and positive modes using 1,5-DAN as a matrix for sublimation.



| Lipid Class    | Measured m/z | Calculated m/z | Error (ppm)    | Lipid Annotation | Molecular Formula | Ion form                    | Distribution in Brain       |
|----------------|--------------|----------------|----------------|------------------|-------------------|-----------------------------|-----------------------------|
| <b>SHexCer</b> | 806.545      | 806.545        | 0.62           | SHexCer(d36:1)   | C42H80NO11S       | [M-H]-                      | CC                          |
|                | 822.540      | 822.540        | 0.61           | SHexCer(t36:1)   | C42H80NO12S       | [M-H]-                      | CC                          |
|                | 834.577      | 834.577        | 0.72           | SHexCer(d38:1)   | C44H84NO11S       | [M-H]-                      | CC, CbWM, Th, Hy, MB, P, M, |
|                | 850.574      | 850.572        | 2.35           | SHexCer(t38:1)   | C44H84NO12S       | [M-H]-                      | CC, CbWM, Th, Hy, MB, P, M, |
|                | 860.593      | 860.592        | 1.28           | SHexCer(d40:2)   | C46H86NO11S       | [M-H]-                      | CC, CbWM, Th, Hy, MB, P, M, |
|                | 862.609      | 862.608        | 1.97           | SHexCer(d40:1)   | C46H88NO11S       | [M-H]-                      | CC, CbWM, Th, Hy, MB, P, M, |
|                | 864.623      | 864.624        | 0.93           | SHexCer(d40:0)   | C46H90NO11S       | [M-H]-                      | CC, CbWM, Th, Hy, MB, P, M, |
|                | 874.608      | 874.608        | 0.57           | SHexCer(d41:2)   | C47H88NO11S       | [M-H]-                      | CC, CbWM, Th, Hy, MB, P, M, |
|                | 876.626      | 876.624        | 2.97           | SHexCer(d41:1)   | C47H90NO11S       | [M-H]-                      | CC, CbWM, Th, Hy, MB, P, M, |
|                | 878.603      | 878.603        | 0.11           | SHexCer(t40:1)   | C46H88NO12S       | [M-H]-                      | CC, CbWM, Th, Hy, MB, P, M, |
|                | 880.619      | 880.618        | 0.91           | SHexCer(t40:0)   | C46H90NO12S       | [M-H]-                      | CC, CbWM, Th, Hy, MB, P, M, |
|                | 888.623      | 888.624        | 0.68           | SHexCer(d42:2)   | C48H90NO11S       | [M-H]-                      | CC, CbWM, Th, Hy, MB, P, M, |
|                | 890.640      | 890.639        | 0.67           | SHexCer(d42:1)   | C48H92NO11S       | [M-H]-                      | CC, CbWM, Th, Hy, MB, P, M, |
|                | 902.641      | 902.639        | 1.88           | SHexCer(d43:2)   | C49H92NO11S       | [M-H]-                      | CC, CbWM, Th, Hy, MB, P, M, |
|                | 904.621      | 904.618        | 2.54           | SHexCer(t42:2)   | C48H90NO12S       | [M-H]-                      | CC, CbWM, Th, Hy, MB, P, M, |
| 906.634        | 906.634      | 0.11           | SHexCer(t42:1) | C48H92NO12S      | [M-H]-            | CC, CbWM, Th, Hy, MB, P, M, |                             |
| <b>PI</b>      | 599.320      | 599.320        | 0.00           | LPI(18:0)        | C27H52O12P        | [M-H]-                      | CerC, HC, CP, CbC           |
|                | 857.518      | 857.518        | 0.00           | PI(36:4)         | C45H78O13P        | [M-H]-                      | CerC, HC, CP, CbC           |
|                | 881.519      | 881.518        | 1.36           | PI(38:6)         | C47H78O13P        | [M-H]-                      | CbC, CerC                   |
|                | 883.534      | 883.534        | 0.00           | PI(38:5)         | C47H80O13P        | [M-H]-                      | CerC, HC, CP, CbC           |
|                | 885.549      | 885.549        | 0.00           | PI(38:4)         | C47H82O13P        | [M-H]-                      | CerC, HC, CP, CbC           |

**SHexCer** Sulfatide, **PI** Phosphatidyl Inositol, **CC** Corpus Callosum, **CerC** Cerebral Cortex, **HC** Hippocampus, **CbC** Cerebellar Cortex, **CbWM** Cerebellar White Matter, **Th** Thalamus, **Hy** Hypothalamus, **CP** Caudate Putamen, **MB** Mid-Brain, **P** Pons, **M** medulla

| Lipid Class | Measured m/z | Calculated m/z | Error (ppm) | Lipid Annotation | Molecular Formula | Ion form | Distribution in Brain       |
|-------------|--------------|----------------|-------------|------------------|-------------------|----------|-----------------------------|
| <b>PG</b>   | 747.516      | 747.518        | 2.54        | PG(34:1)         | C40H76O10P        | [M-H]-   | CerC, HC, CP, CbC           |
| <b>PS</b>   | 788.544      | 788.544        | 0.25        | PS(36:1)         | C42H79NO10P       | [M-H]-   | CC, CbWM, Th, Hy, MB, P, M, |
|             | 786.528      | 786.529        | 0.51        | PS(36:2)         | C42H77NO10P       | [M-H]-   | CbC                         |
|             | 810.530      | 810.529        | 1.23        | PS(38:4)         | C44H77NO10P       | [M-H]-   | MB, Th                      |
|             | 834.529      | 834.529        | 0.24        | PS(40:6)         | C46H77NO10P       | [M-H]-   | CerC, HC, CbC, CP           |
| <b>PA</b>   | 647.465      | 647.465        | 0.15        | PA(32:0)         | C35H68O8P         | [M-H]-   | CerC, HC, CbC               |
|             | 673.481      | 673.481        | 0.74        | PA(34:1)         | C37H70O8P         | [M-H]-   | CerC, HC, CbC               |
|             | 699.496      | 699.497        | 0.57        | PA(36:2)         | C39H72O8P         | [M-H]-   | CerC, HC, CbC               |
|             | 701.512      | 701.512        | 0.29        | PA(36:1)         | C39H74O8P         | [M-H]-   | CC, CbWM, MB, P, M          |
|             | 747.496      | 747.497        | 1.07        | PA(40:6)         | C43H72O8P         | [M-H]-   | CerC, HC, CbC               |
| <b>PE</b>   | 716.523      | 716.523        | 0.00        | PE(34:1)         | C39H75NO8P        | [M-H]-   | CerC, HC, CbC               |
|             | 726.544      | 726.544        | 0.00        | PE(P-36:2)       | C41H77NO7P        | [M-H]-   | CC, CbWM, Th, Hy, MB, P, M, |
|             | 728.559      | 728.559        | 0.00        | PE(P-36:1)       | C41H79NO7P        | [M-H]-   | CC, CbWM, Th, Hy, MB, P, M, |
|             | 742.539      | 742.539        | 0.00        | PE(36:2)         | C41H77NO8P        | [M-H]-   | CbC, P, M, MB, Th, Hy       |
|             | 744.554      | 744.554        | 0.00        | PE(36:1)         | C41H79NO8P        | [M-H]-   | CerC, HC, CbC               |
|             | 746.513      | 746.513        | 0.54        | PE(P-38:6)       | C43H73NO7P        | [M-H]-   | CerC, HC, CP, CbC           |
|             | 750.544      | 750.544        | 0.80        | PE(P-38:4)       | C43H77NO7P        | [M-H]-   | CerC, HC, CP, CbC           |
|             | 762.507      | 762.507        | 0.00        | PE(38:6)         | C43H73NO8P        | [M-H]-   | CerC, HC, CP                |
|             | 764.523      | 764.523        | 0.00        | PE(38:5)         | C43H75NO8P        | [M-H]-   | CerC, HC, CP, CbC           |
|             | 766.539      | 766.539        | 0.00        | PE(38:4)         | C43H77NO8P        | [M-H]-   | CerC, HC, CP, CbC           |
|             | 774.544      | 774.544        | 0.00        | PE(P-40:6)       | C45H77NO7P        | [M-H]-   | CerC, HC, CP, CbC           |
|             | 776.560      | 776.559        | 0.90        | PE(P-40:5)       | C45H79NO7P        | [M-H]-   | CerC, HC, CP, CbC           |
|             | 790.539      | 790.539        | 0.00        | PE(40:6)         | C45H77NO8P        | [M-H]-   | CerC, HC, CP, CbC           |
|             | 794.570      | 794.570        | 0.00        | PE(40:4)         | C45H81NO8P        | [M-H]-   | CerC, HC, CP, CbC           |
|             | 824.557      | 824.556        | 0.85        | PE(39:2)         | C44H84NO8PK       | [M+K]+   | CC, CbWM, Th, Hy, MB,       |

**PG** Phosphatidyl Glycerol, **PS** Phosphatidyl Serine, **PA** Phosphatidic Acid, **PE** Phosphatidyl- Ethanolamine, **CC** Corpus Callosum, **CerC** Cerebral Cortex, **HC** Hippocampus, **CbC**, Cerebellar Cortex, **CbWM** Cerebellar White Matter, **Th** Thalamus, **Hy** Hypothalamus, **CP** Caudate Putamen, **MB** Mid-Brain, **P**, Pons; **M**, medulla

| Lipid Class | Measured m/z | Calculated m/z | Error (ppm) | Lipid Annotation | Molecular Formula | Ion form            | Distribution in Brain      |
|-------------|--------------|----------------|-------------|------------------|-------------------|---------------------|----------------------------|
| PC          | 734.569      | 734.569        | 0.14        | PC(32:0)         | C40H81NO8P        | [M+H] <sup>+</sup>  | CerC, HC, CbC              |
|             | 756.552      | 756.551        | 1.06        |                  | C40H80NO8PNa      | [M+Na] <sup>+</sup> |                            |
|             | 772.526      | 772.525        | 0.91        |                  | C40H80NO8PK       | [M+K] <sup>+</sup>  |                            |
|             | 732.554      | 732.553        | 0.96        | PC(32:1)         | C40H79NO8P        | [M+H] <sup>+</sup>  | CC, CbWM                   |
|             | 770.510      | 770.509        | 1.04        |                  | C40H78NO8PK       | [M+K] <sup>+</sup>  |                            |
|             | 760.585      | 760.585        | 0.00        | PC(34:1)         | C42H83NO8P        | [M+H] <sup>+</sup>  | Ubiquitous                 |
|             | 798.541      | 798.541        | 0.50        |                  | C42H82NO8PK       | [M+K] <sup>+</sup>  |                            |
|             | 758.570      | 758.569        | 1.05        | PC(34:2)         | C42H81NO8P        | [M+H] <sup>+</sup>  | CC, CbWM                   |
|             | 796.525      | 796.525        | 0.50        |                  | C42H80NO8PK       | [M+K] <sup>+</sup>  |                            |
|             | 788.616      | 788.616        | 0.13        | PC(36:1)         | C44H87NO8P        | [M+H] <sup>+</sup>  | CC, CbWM, Th, Hy, MB, P, M |
|             | 826.572      | 826.572        | 0.48        |                  | C44H86NO8PK       | [M+K] <sup>+</sup>  |                            |
|             | 786.601      | 786.600        | 0.38        | PC(36:2)         | C44H85NO8P        | [M+H] <sup>+</sup>  | CC, CbWM, Th, MB, P, M     |
|             | 824.557      | 824.556        | 0.85        |                  | C44H84NO8PK       | [M+K] <sup>+</sup>  |                            |
|             | 782.568      | 782.569        | 1.28        | PC(36:4)         | C44H81NO8P        | [M+H] <sup>+</sup>  | HC, CP, Th                 |
|             | 804.552      | 804.551        | 0.87        |                  | C44H80NO8PNa      | [M+Na] <sup>+</sup> |                            |
|             | 820.525      | 820.525        | 0.61        | PC(36:4)         | C44H80NO8PK       | [M+K] <sup>+</sup>  |                            |
|             | 810.600      | 810.600        | 0.12        | PC(38:4)         | C46H85NO8P        | [M+H] <sup>+</sup>  | HC, CP                     |
|             | 848.556      | 848.556        | 0.59        |                  | C46H84NO8PK       | [M+K] <sup>+</sup>  |                            |
|             | 846.540      | 846.541        | 0.24        | PC(38:5)         | C46H82NO8PK       | [M+K] <sup>+</sup>  | HC, CP                     |
|             | 872.556      | 872.556        | 0.57        |                  | C48H84NO8PK       | [M+K] <sup>+</sup>  |                            |
|             | 870.540      | 870.541        | 0.69        | PC(40:7)         | C48H82NO8PK       | [M+K] <sup>+</sup>  | CC, CbWM, MB, P, M         |
|             | 806.569      | 806.569        | 0.12        | PC(38:6)         | C46H81NO8P        | [M+H] <sup>+</sup>  | CbC, CerC, Th, Hy, MB      |
|             | 828.551      | 828.551        | 0.00        |                  | C46H80NO8PNa      | [M+Na] <sup>+</sup> |                            |
|             | 844.525      | 844.525        | 0.36        |                  | C46H80NO8PK       | [M+K] <sup>+</sup>  |                            |
|             | 834.600      | 834.600        | 0.12        | PC(40:6)         | C48H85NO8P        | [M+H] <sup>+</sup>  | CbC, MB, P, M              |
|             | 856.582      | 856.582        | 0.12        |                  | C48H84NO8PNa      | [M+Na] <sup>+</sup> |                            |

---

PC Phosphatidyl Choline, CC Corpus Callosum, CerC Cerebral Cortex, HC Hippocampus, CbC Cerebellar Cortex, CbWM Cerebellar White Matter, Th Thalamus, Hy Hypothalamus, CP Caudate Putamen, MB Mid-Brain, P Pons, M medulla

**Table S2.** Lipid identification by tandem MS/MS.

| Parent ion (m/z) | Ion form           | Fragment ion | Lipid Annotation       | Tentative Molecular Formula                        |
|------------------|--------------------|--------------|------------------------|----------------------------------------------------|
| 888.625          | (M-H) <sup>-</sup> |              | SHexCer (C18:1/ 24:1)  | C <sub>48</sub> H <sub>91</sub> O <sub>11</sub> NS |
|                  |                    | 241.002      |                        | C <sub>6</sub> H <sub>9</sub> O <sub>8</sub> S     |
| 860.592          | (M-H) <sup>-</sup> |              | SHexCer (C18:1/22:1)   | C <sub>46</sub> H <sub>87</sub> O <sub>11</sub> NS |
|                  |                    | 241.002      |                        | C <sub>6</sub> H <sub>9</sub> O <sub>8</sub> S     |
| 862.608          | (M-H) <sup>-</sup> |              | SHexCer (C18:1/ 22:0)  | C <sub>46</sub> H <sub>89</sub> O <sub>11</sub> NS |
|                  |                    | 241.002      |                        | C <sub>6</sub> H <sub>9</sub> O <sub>8</sub> S     |
| 806.54520        | (M-H) <sup>-</sup> |              | SHexCer (d18:0 18:0)   | C <sub>47</sub> H <sub>80</sub> O <sub>11</sub> NS |
|                  |                    | 241.002      |                        | C <sub>6</sub> H <sub>9</sub> O <sub>8</sub> S     |
|                  |                    | 255.233      |                        | C <sub>16</sub> H <sub>31</sub> O <sub>2</sub>     |
| 904.619          | (M-H) <sup>-</sup> |              | SHexCer (C18:1/ h24:1) | C <sub>48</sub> H <sub>91</sub> O <sub>12</sub> NS |
|                  |                    | 241.002      |                        | C <sub>6</sub> H <sub>9</sub> O <sub>8</sub> S     |
|                  |                    | 522.275      |                        | C <sub>24</sub> H <sub>44</sub> O <sub>9</sub> NS  |
|                  |                    | 554.300      |                        | C <sub>25</sub> H <sub>48</sub> O <sub>10</sub> NS |
|                  |                    | 568.280      |                        | C <sub>25</sub> H <sub>47</sub> O <sub>11</sub> NS |
| 906.6351         | (M-H) <sup>-</sup> |              | SHexCer (C18:1/ h24:0) | C <sub>48</sub> H <sub>93</sub> O <sub>12</sub> NS |
|                  |                    | 241.002      |                        | C <sub>6</sub> H <sub>9</sub> O <sub>8</sub> S     |
|                  |                    | 522.275      |                        | C <sub>24</sub> H <sub>44</sub> O <sub>9</sub> NS  |
|                  |                    | 554.300      |                        | C <sub>25</sub> H <sub>48</sub> O <sub>10</sub> NS |
|                  |                    | 568.280      |                        | C <sub>25</sub> H <sub>47</sub> O <sub>11</sub> NS |
| 834.53           | (M-H) <sup>-</sup> |              | PS (40:6)              | C <sub>46</sub> H <sub>77</sub> NO <sub>10</sub> P |
|                  |                    | 283.264      |                        | C <sub>18</sub> H <sub>35</sub> O <sub>2</sub>     |
| 716.5242         | (M-H) <sup>-</sup> |              | PE (34:1)              | C <sub>39</sub> H <sub>75</sub> NO <sub>8</sub> P  |
|                  |                    | 255.233      |                        | C <sub>16</sub> H <sub>31</sub> O <sub>2</sub>     |
|                  |                    | 281.248      |                        | C <sub>18</sub> H <sub>33</sub> O <sub>2</sub>     |
| 744.5555         | (M-H) <sup>-</sup> |              | PE (36:1)              | C <sub>41</sub> H <sub>79</sub> NO <sub>8</sub> P  |
|                  |                    | 281.248      |                        | C <sub>18</sub> H <sub>33</sub> O <sub>2</sub>     |
|                  |                    | 283.264      |                        | C <sub>18</sub> H <sub>35</sub> O <sub>2</sub>     |
| 742.5414         | (M-H) <sup>-</sup> |              | PE (36:2)              | C <sub>41</sub> H <sub>77</sub> NO <sub>8</sub> P  |
|                  |                    | 281.248      |                        | C <sub>18</sub> H <sub>33</sub> O <sub>2</sub>     |
| 774.545          | (M-H) <sup>-</sup> |              | PE (O-40:6)            | C <sub>45</sub> H <sub>77</sub> NO <sub>7</sub> P  |
|                  |                    | 196.038      |                        | C <sub>5</sub> H <sub>11</sub> O <sub>5</sub> PN   |
|                  |                    | 255.233      |                        | C <sub>16</sub> H <sub>31</sub> O <sub>2</sub>     |
|                  |                    | 267.269      |                        | C <sub>18</sub> H <sub>35</sub> O                  |
| 747.5191         | (M-H) <sup>-</sup> |              | PG (34:1)              | C <sub>40</sub> H <sub>76</sub> O <sub>10</sub> P  |
|                  |                    | 255.233      |                        | C <sub>16</sub> H <sub>31</sub> O <sub>2</sub>     |
|                  |                    | 281.248      |                        | C <sub>18</sub> H <sub>33</sub> O <sub>2</sub>     |
| 885.55130        | (M-H) <sup>-</sup> |              | PI (O-38:4(OH))        | C <sub>47</sub> H <sub>87</sub> O <sub>13</sub> P  |
|                  |                    | 223.001      |                        | C <sub>6</sub> H <sub>8</sub> O <sub>7</sub> P     |
|                  |                    | 241.012      |                        | C <sub>6</sub> H <sub>10</sub> O <sub>8</sub> P    |
|                  |                    | 259.243      |                        | C <sub>12</sub> O <sub>3</sub> H <sub>36</sub> P   |
|                  |                    | 283.264      |                        | C <sub>18</sub> H <sub>35</sub> O <sub>2</sub>     |
|                  |                    | 297.038      |                        | C <sub>9</sub> H <sub>14</sub> O <sub>9</sub> P    |
|                  |                    | 303.233      |                        | C <sub>13</sub> O <sub>5</sub> H <sub>36</sub> P   |

SHexCer Sulfatide, PS Phosphatidyl Serine, PE Phosphatidyl Ethanolamine, PG Phosphatidyl Glycerol, PI Phosphatidyl Inositol
